# Supplementary material for: A synergistic heterojunction of SnS2/SnSSe nanosheets on GaN for advanced self-powered photodetectors
Source: Royal Society of Chemistry journal article supplement (doi:10.1039/d4nh00102h), 2024-01-01
Supplement: d4nh00102h1.pdf [file d4nh00102h1.pdf]

## Supporting Information

### **Synergistic Heterojunction of SnS<sub>2</sub>/SnSSe Nanosheets on GaN for Advanced Self-powered Photodetectors**

Sukhendu Maity and Praveen Kumar\*

*School of Materials Science, Indian Association for the Cultivation of Science, Kolkata, 700032, India*

#### **Contents**

|                                                                                                                                                                                                                                                                                                                                                                                                                       |   |
|-----------------------------------------------------------------------------------------------------------------------------------------------------------------------------------------------------------------------------------------------------------------------------------------------------------------------------------------------------------------------------------------------------------------------|---|
| Figure S1. (a) a), (b) Rietveld refinement of SnS <sub>2</sub> and SnSSe bulk powder respectively, (c) XPS survey spectrum of SnS <sub>2</sub> and SnSSe, (d) High-resolution XPS of deconvoluted S 2p for SnSSe, (e) High-resolution XPS of deconvoluted S 2p for SnS <sub>2</sub> , (e) valence band spectrum with respect to the Fermi level of SnS <sub>2</sub> and SnSSe, (f) AFM images of SnSSe 2d sheet. .... | 2 |
| Figure. S2. (a) HAADF mapping of SnS <sub>2</sub> nanosheet (b), HAADF mapping of SnSSe nanosheet (c) EDX spectra of SnS <sub>2</sub> and SnSSe nanosheets. ....                                                                                                                                                                                                                                                      | 2 |
| Figure S3. (a) Absorbance spectra for bulk SnS <sub>2</sub> and SnSSe powder sample, (b),(c) Absorbance spectra for exfoliated SnS <sub>2</sub> and SnSSe in isopropanol solvent, (d) Deconvoluted PL spectrum of exfoliated SnS <sub>2</sub> , (e) PL quenching of SnS <sub>2</sub> in the presence of SnSSe, (f) schematic representation of the electron transfer process from SnS <sub>2</sub> to SnSSe. ....     | 3 |
| Figure S4. (a)X(a) semi-logarithmic I-V curves of the fabricated devices, (b)- (c) Photoresponse recorded with varying intensity under 365 nm illumination, (e)-(f) Bias dependent photoswitching of the device D1 and D2 at the fixed intensity of 1058 μW/cm <sup>2</sup> . ....                                                                                                                                    | 3 |
| Figure S5. (a),(b) Schematics of energy band diagram for D <sub>1</sub> and D <sub>2</sub> device configuration, (c) Simulated electron density distribution of SnS <sub>2</sub> /SnSSe heterostructure. ....                                                                                                                                                                                                         | 4 |
| Table ST1. Parameters to calculate the average photoluminescence lifetime of carriers. ....                                                                                                                                                                                                                                                                                                                           | 5 |
| Table ST2. Parameters to calculate the average photoluminescence lifetime of carriers. ....                                                                                                                                                                                                                                                                                                                           | 5 |
| Table ST3. Performance comparison of our fabricated device with other reported work. ....                                                                                                                                                                                                                                                                                                                             | 6 |
| Table ST4. Population analysis (Mulliken and Hirshfeld) for geometry-optimized SnS <sub>2</sub> . ....                                                                                                                                                                                                                                                                                                                | 7 |
| Table ST5. Population analysis for geometry optimized SnSSe. ....                                                                                                                                                                                                                                                                                                                                                     | 7 |
| Table ST6. Population analysis for SnS <sub>2</sub> / SnSSe heterostructures. ....                                                                                                                                                                                                                                                                                                                                    | 8 |

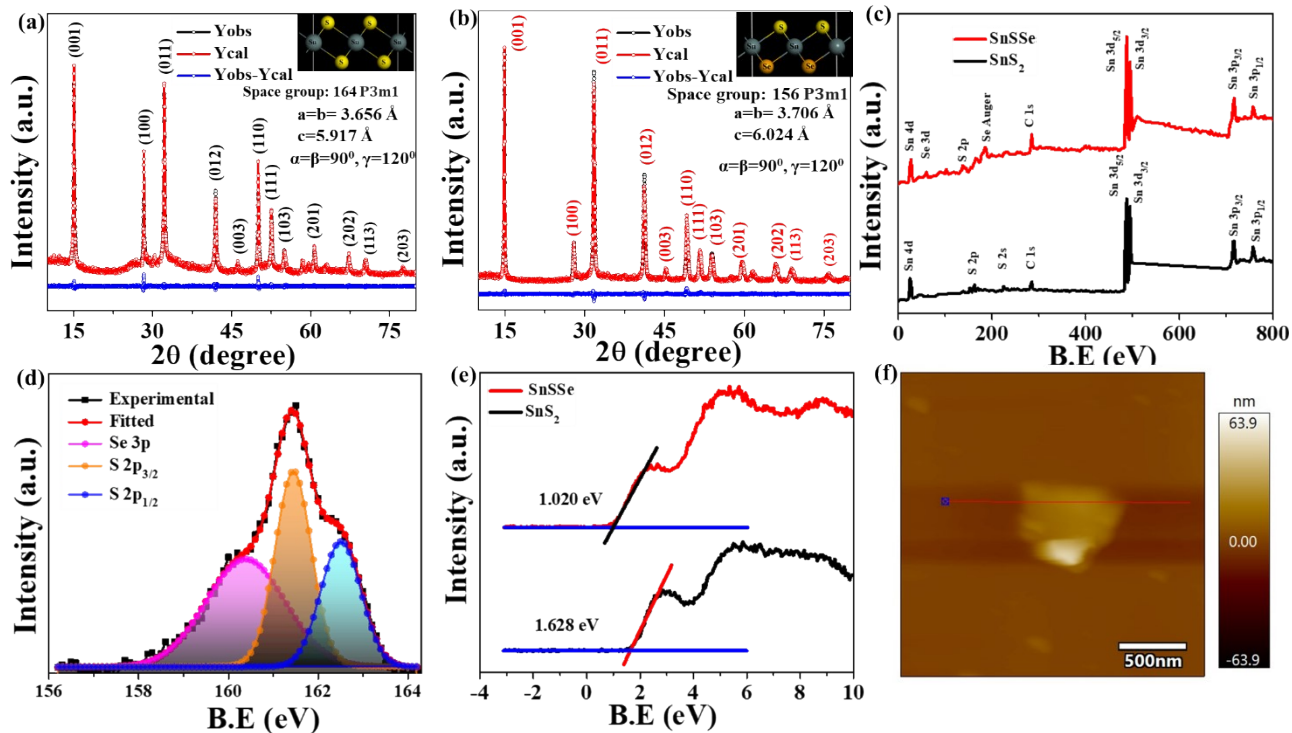

**Figure. S1.** (a), (b) Rietveld refinement of SnS<sub>2</sub> and SnSSe bulk powder respectively, (c) XPS survey spectrum of SnS<sub>2</sub> and SnSSe, (d) High resolution XPS of deconvoluted S 2p for SnSSe, (e) High resolution XPS of deconvoluted S 2p for SnS<sub>2</sub>, (e) valence band spectrum with respect to the Fermi level of SnS<sub>2</sub> and SnSSe, (f) AFM images of SnSSe 2d sheet.

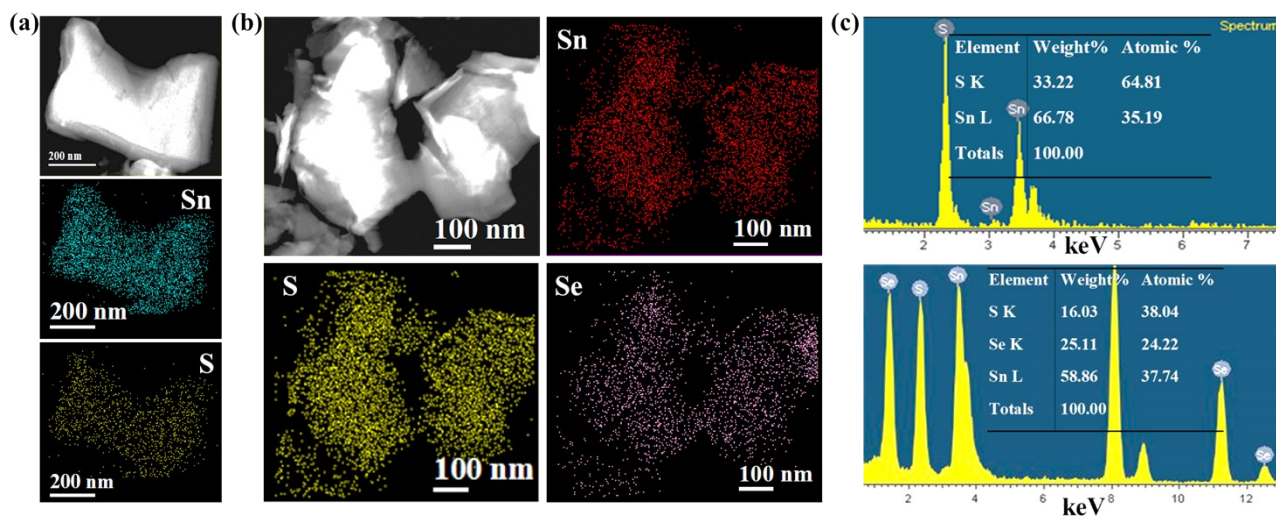

**Figure. S2.** (a) HAADF mapping of SnS<sub>2</sub> nanosheet (b), HAADF mapping of SnSSe nanosheet (c) EDX spectra of SnS<sub>2</sub> and SnSSe nanosheets.

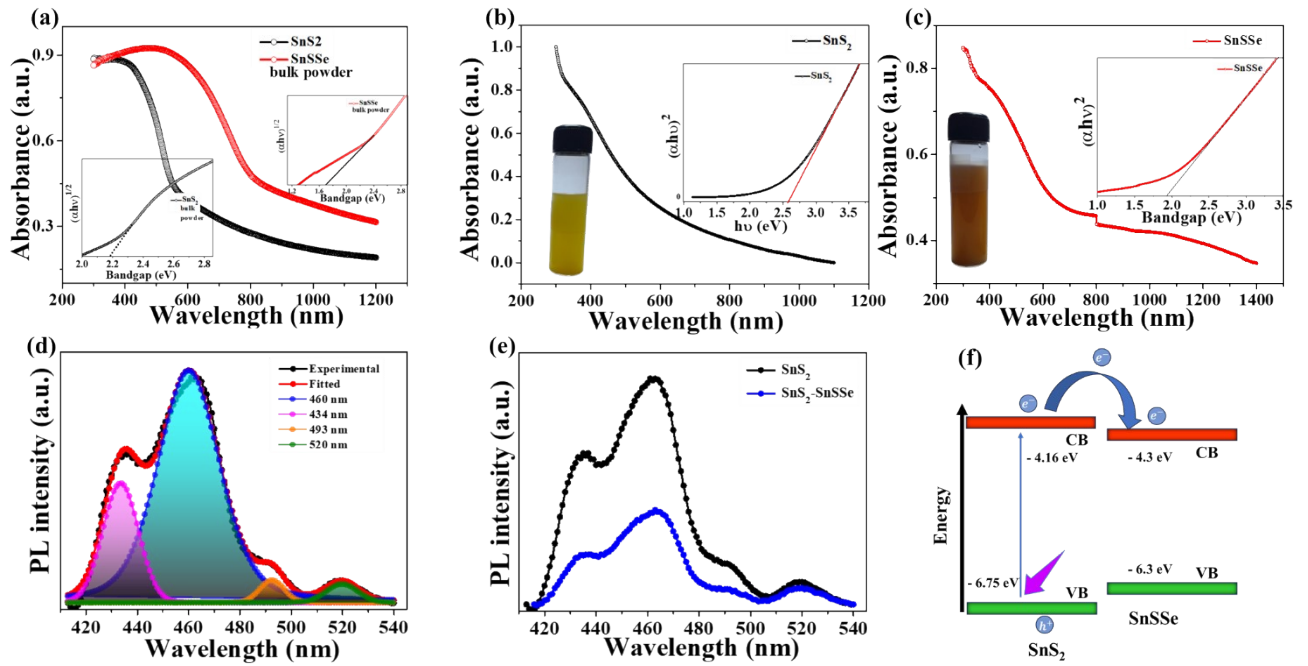

**Figure. S3.** (a) Absorbance spectra for bulk SnS<sub>2</sub> and SnSSe powder sample, (b), (c) Absorbance spectra for exfoliated SnS<sub>2</sub> and SnSSe in isopropanol solvent, (d) Deconvoluted PL spectrum of exfoliated SnS<sub>2</sub>, (e) PL quenching of SnS<sub>2</sub> in presence of SnSSe, (f) schematic representation of the electron transfer process from SnS<sub>2</sub> to SnSSe.

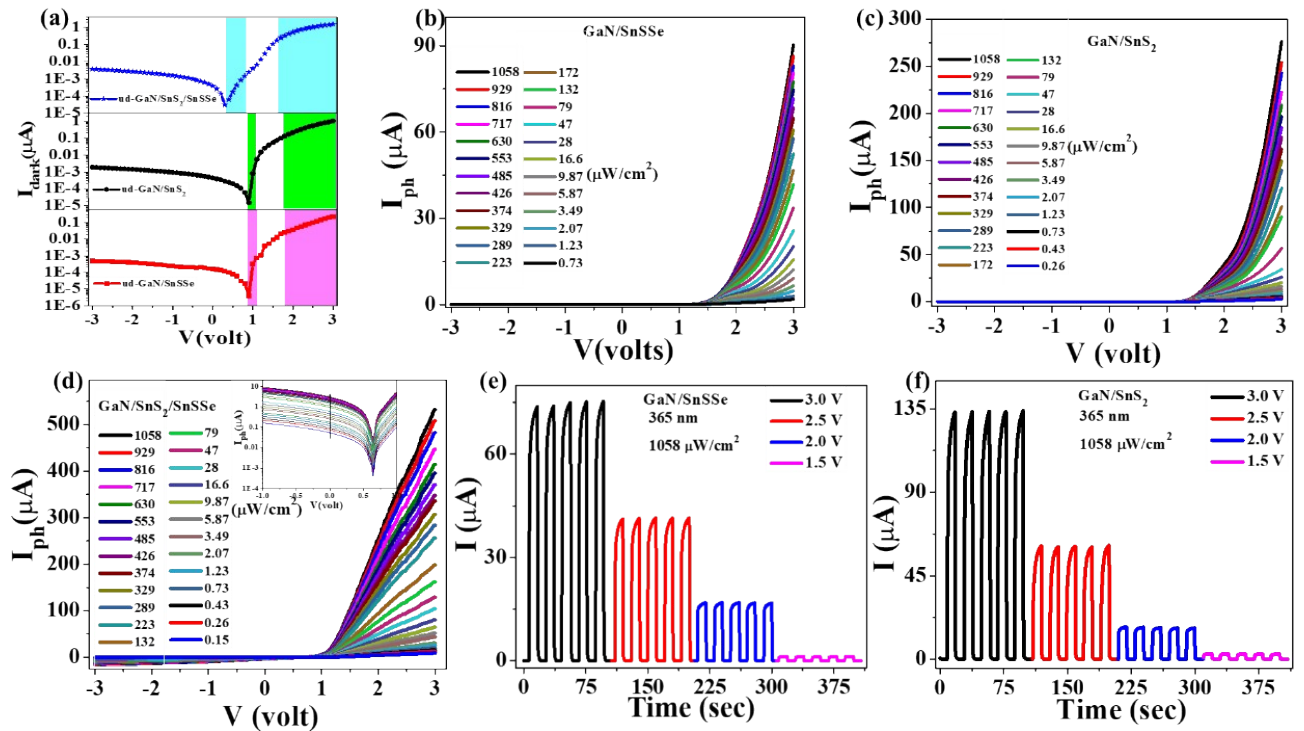

**Figure. S4.** (a) semi-logarithmic I-V curves of the fabricated devices, (b)- (c) Photoresponse recorded with varying intensity under 365 nm illumination, (e)-(f) Bias Photoresponse recorded with varying intensity under 365 nm illumination.

dependent photo switching of the device D<sub>1</sub> and D<sub>2</sub> at fixed intensity of 1058  $\mu\text{W}/\text{cm}^2$ .

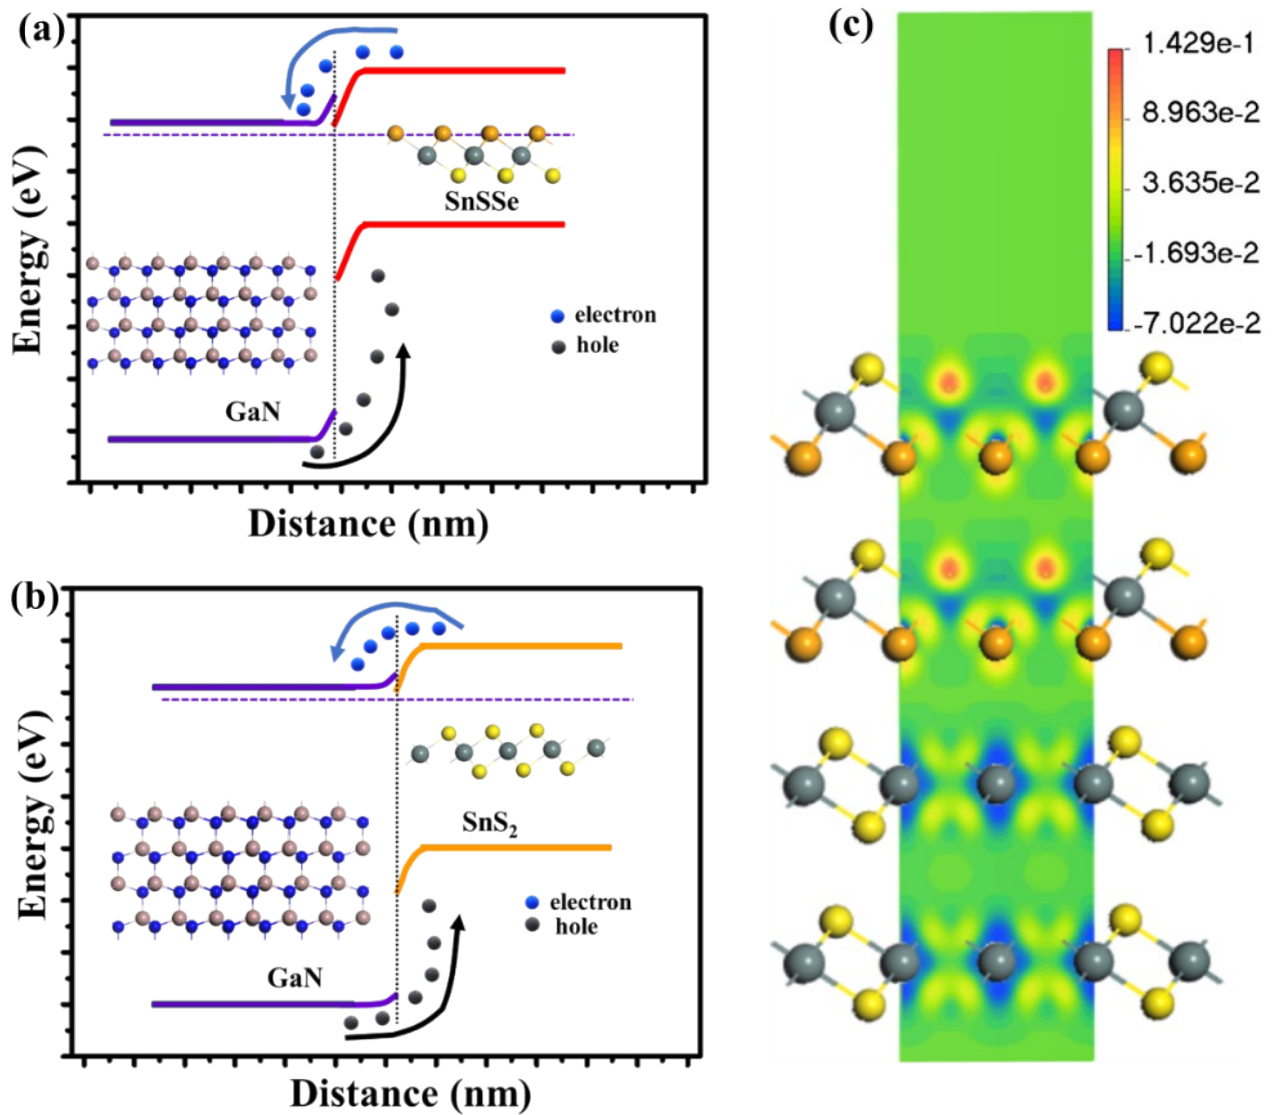

**Figure. S5.** (a), (b) Schematics of energy band diagram for D<sub>1</sub> and D<sub>2</sub> device configuration, (c) Simulated electron density distribution of SnS<sub>2</sub>/SnSSe heterostructure.

**Table ST1. Parameters to calculate the average photoluminescence lifetime of carriers**

$$T = A + B_1 * \exp(-i/T_1) + B_2 * \exp(i/T_2)$$

| Sample                   | Excitation (nm) | Emission (nm) | Average life time (ns) | T <sub>1</sub> (ns) | T <sub>2</sub> (ns) | B <sub>1</sub> | B <sub>2</sub> |
|--------------------------|-----------------|---------------|------------------------|---------------------|---------------------|----------------|----------------|
| SnS <sub>2</sub>         |                 |               | 2.629                  | 0.914461            | 6.04562             | 66.57          | 33.43          |
|                          | <b>375</b>      | <b>460</b>    |                        |                     |                     |                |                |
| SnS <sub>2</sub> - SnSSe |                 |               | 1.483                  | 0.900447            | 5.2463              | 86.59          | 13.41          |

**Table ST2. Parameters to calculate the average photoluminescence lifetime of carriers.**

$$T = A + B_1 * \exp(-i/T_1) + B_2 * \exp(i/T_2)$$

| Device configuration        | Excitation (nm) | Emission (nm) | Average life time (ns) | T <sub>1</sub> (ns) | T <sub>2</sub> (ns) | B <sub>1</sub> | B <sub>2</sub> |
|-----------------------------|-----------------|---------------|------------------------|---------------------|---------------------|----------------|----------------|
| GaN/SnS <sub>2</sub>        |                 |               | 6.692                  | 0.52091             | 7.36049             | 9.76           | 90.23          |
| GaN/SnSSe                   | <b>375</b>      | <b>460</b>    | 6.603                  | 0.29676             | 7.25718             | 9.39           | 90.60          |
| GaN/SnS <sub>2</sub> /SnSSe |                 |               | 4.931                  | 0.71218             | 7.37601             | 36.69          | 63.31          |

**Table ST3. Performance comparison of our fabricated device with other reported work.**

| Device configuration                                               | Wavelength (nm) | Bias (volt) | R (A/W)                 | EQE (%)                | D* (Jones)              | Refer.    |
|--------------------------------------------------------------------|-----------------|-------------|-------------------------|------------------------|-------------------------|-----------|
| CTS QDs/SnS <sub>2</sub>                                           | 320             | 5           | 53.88                   | 20,878                 | 3.2 × 10 <sup>13</sup>  | 1         |
| SnS <sub>2</sub> /ITO                                              | 405             | 3           | 58 × 10 <sup>-3</sup>   | 17.9                   | 1.53 × 10 <sup>10</sup> | 2         |
| Cr: Au/SnS <sub>2</sub> /Cr: Au                                    | 365             | 1           | 112                     | 3.7 × 10 <sup>4</sup>  | 1.18 × 10 <sup>11</sup> | 3         |
| Ag/SnS <sub>2</sub> /Ag                                            | 365             | 5           | 5.5                     | 1868                   | 1.72 × 10 <sup>13</sup> | 4         |
| Si/SnS <sub>2</sub>                                                | 405             | -2          | 0.12                    |                        | 9.35 × 10 <sup>10</sup> | 5         |
| SnS <sub>2</sub> /Si NW                                            | 340             | 2           | 100                     | 3.64 × 10 <sub>4</sub> | 1.14 × 10 <sup>14</sup> | 6         |
| Au/In-SnS <sub>2</sub> /Au                                         | 405             | 5           | 153.8                   | 4.72 × 10 <sub>4</sub> | 5.81 × 10 <sup>12</sup> | 7         |
| SnS <sub>2</sub> /PEDOT: PSS                                       | 300             | -1          | 182.89                  | 7.55 × 10 <sub>4</sub> | 1.44 × 10 <sup>12</sup> | 8         |
| Al/SnS <sub>2</sub> /CuO/<br>PEDOT: PSS/ITO                        | 300             | -1          | 1.87                    | 775.41                 | 1.10 × 10 <sup>11</sup> | 9         |
| SnS <sub>2</sub> /Ag <sub>2</sub> S                                | 405             | 2           | 4.52                    |                        | 3.53 × 10 <sup>11</sup> | 10        |
| SnS <sub>2</sub> /GaN                                              | 265             | 0           | 3.52                    |                        | 1.76 × 10 <sup>14</sup> | 11        |
| p-Si/SnS <sub>2</sub>                                              | 365             | 0           | 0.0125                  |                        | 2.85 × 10 <sup>7</sup>  | 12        |
| InSe/SnS <sub>2</sub> /GeSe                                        | 355             | 0           | 1.87                    | 656                    | 8.39 × 10 <sup>12</sup> | 13        |
| SnO <sub>2</sub> /In <sub>2</sub> O <sub>3</sub> /SnS <sub>2</sub> | 555             | 0           | 2.9 × 10 <sup>-3</sup>  |                        | 5.9 × 10 <sup>7</sup>   | 14        |
| ITO/SnS <sub>2</sub> /ZnO <sub>1-x</sub> S <sub>x</sub> /Au        | 365             | 0           | 8.28 × 10 <sup>-3</sup> |                        | 5.09 × 10 <sup>10</sup> | 15        |
| Ud-GaN/SnS <sub>2</sub> /SnSSe                                     | 365             | 3           | 314.96                  | 10.7 × 10 <sub>4</sub> | 2.00 × 10 <sup>14</sup> | This work |
|                                                                    |                 | 0           | 1.52                    | 519                    | 6.06 × 10 <sup>13</sup> |           |

**Table ST4. Population analysis (Mulliken and Hirshfeld) for geometry optimized SnS<sub>2</sub>.**

| Atomic Populations (Mulliken) |     |      |      |      |      |       |            | Hirshfeld Analysis |     |                      |
|-------------------------------|-----|------|------|------|------|-------|------------|--------------------|-----|----------------------|
| Species                       | Ion | s    | p    | d    | f    | Total | Charge (e) | Species            | Ion | Hirshfeld Charge (e) |
| S                             | 1   | 1.89 | 4.57 | 0.00 | 0.00 | 6.46  | -0.46      | S                  | 1   | -0.14                |
| S                             | 2   | 1.89 | 4.57 | 0.00 | 0.00 | 6.46  | -0.46      | S                  | 2   | -0.14                |
| Sn                            | 1   | 1.16 | 1.92 | 0.00 | 0.00 | 3.08  | 0.92       | Sn                 | 1   | 0.28                 |

**Table ST5. Population analysis (Mulliken and Hirshfeld) for geometry optimized SnSSe.**

| Atomic Populations (Mulliken) |     |      |      |      |      |       |            | Hirshfeld Analysis |     |                      |
|-------------------------------|-----|------|------|------|------|-------|------------|--------------------|-----|----------------------|
| Species                       | Ion | s    | p    | d    | f    | Total | Charge (e) | Species            | Ion | Hirshfeld Charge (e) |
| S                             | 1   | 1.90 | 4.56 | 0.00 | 0.00 | 6.46  | -0.46      | S                  | 1   | -0.15                |
| Se                            | 1   | 1.79 | 4.45 | 0.00 | 0.00 | 6.24  | -0.24      | Se                 | 1   | -0.11                |
| Sn                            | 1   | 1.31 | 1.99 | 0.00 | 0.00 | 3.30  | 0.70       | Sn                 | 1   | 0.26                 |

**Table ST6. Population analysis for SnS<sub>2</sub>/ SnSSe heterostructures.**

| Atomic Populations (Mulliken) |     |      |      |      |      |                  | Hirshfeld Analysis |     |                      |       |
|-------------------------------|-----|------|------|------|------|------------------|--------------------|-----|----------------------|-------|
| Species                       | Ion | s    | p    | d    | f    | Total Charge (e) | Species            | Ion | Hirshfeld Charge (e) |       |
| S                             | 1   | 1.89 | 4.56 | 0.00 | 0.00 | 6.46             | -0.46              | S   | 1                    | -0.14 |
| S                             | 2   | 1.90 | 4.56 | 0.00 | 0.00 | 6.46             | -0.46              | S   | 2                    | -0.14 |
| S                             | 3   | 1.90 | 4.55 | 0.00 | 0.00 | 6.45             | -0.45              | S   | 3                    | -0.15 |
| S                             | 4   | 1.90 | 4.56 | 0.00 | 0.00 | 6.45             | -0.45              | S   | 4                    | -0.14 |
| S                             | 5   | 1.89 | 4.57 | 0.00 | 0.00 | 6.47             | -0.47              | S   | 5                    | -0.15 |
| S                             | 6   | 1.89 | 4.57 | 0.00 | 0.00 | 6.47             | -0.47              | S   | 6                    | -0.15 |
| Se                            | 1   | 1.75 | 4.45 | 0.00 | 0.00 | 6.21             | -0.21              | Se  | 1                    | -0.11 |
| Se                            | 2   | 1.81 | 4.45 | 0.00 | 0.00 | 6.26             | -0.26              | Se  | 2                    | -0.11 |
| Sn                            | 1   | 1.18 | 1.91 | 0.00 | 0.00 | 3.09             | 0.91               | Sn  | 1                    | 0.29  |
| Sn                            | 2   | 1.18 | 1.90 | 0.00 | 0.00 | 3.08             | 0.92               | Sn  | 2                    | 0.29  |
| Sn                            | 3   | 1.31 | 2.01 | 0.00 | 0.00 | 3.32             | 0.68               | Sn  | 3                    | 0.25  |
| Sn                            | 4   | 1.27 | 2.01 | 0.00 | 0.00 | 3.27             | 0.73               | Sn  | 4                    | 0.25  |



## Reference:

- 1 S. M. Yadav and A. Pandey, *IEEE Trans. Electron Devices*, 2020, **67**, 2008–2015.
- 2 H. Tian, C. Fan, G. Liu, Y. Zhang, M. Wang and E. Li, *J. Mater. Sci.*, 2019, **54**, 2059–2065.
- 3 H. Ying, X. Li, Y. Wu, Y. Yao, J. Xi, W. Su, C. Jin, M. Xu, Z. He and Q. Zhang, *Nanoscale Adv.*, 2019, **1**, 3973–3979.
- 4 S. M. Yadav and A. Pandey, *IEEE Trans. Nanotechnol.*, 2020, **19**, 301–307.
- 5 J. Xu, H. Zhang, Z. Song, Y. Xu, Q. Peng, X. Xiu, Z. Li, C. Li, M. Liu and B. Man, *Appl. Surf. Sci.*, 2020, **506**, 144671.
- 6 S. Das, K. J. Sarkar, B. Pal, H. Mondal, S. Pal, R. Basori and P. Banerji, *J. Appl. Phys.*, 2021, **129**, 053105.
- 7 C. Fan, Z. Liu, S. Yuan, X. Meng, X. An, Y. Jing, C. Sun, Y. Zhang, Z. Zhang, M. Wang, H. Zheng and E. Li, *ACS Appl. Mater. Interfaces*, 2021, **13**, 35889–35896.
- 8 A. K. Dwivedi, R. Tripathi, S. Tripathi, S. Jit and S. Tripathi, *IEEE Electron Device Lett.*, 2022, **43**, 1913–1916.
- 9 A. K. Dwivedi and S. Tripathi, *IEEE Trans. Electron Devices*, 2023, **70**, 2378–2383.
- 10 H. Zhang, H. Li, H. Yu, F. Wang, X. Song, Z. Xu, D. Wei, J. Zhang, Z. Dai, Y. Ren, Y. Ye, X. Ren and J. Yao, *Mater. Lett.*, 2023, **330**, 133037.
- 11 T. Chen, Q. Feng, W. Feng and X. Yang, *J. Alloys Compd.*, 2024, **971**, 172657.
- 12 M. Kumar, B. R. Huang, A. Saravanan, H. Sun and S. C. Chen, *Adv. Electron. Mater.*, 2024, **10**, 2400164.
- 13 Y. Yan, J. Li, H. Li, S. Li, Z. Li, W. Gao, Y. Jiang, X. Song, C. Xia and J. Li, *Appl. Phys. Lett.*, 2023, **122**, 043505.
- 14 S. Abbas, D. K. Ban and J. Kim, *Sensors Actuators, A Phys.*, 2019, **293**, 215–221.
- 15 J. Jiang, J. Huang, Z. Ye, S. Ruan and Y. J. Zeng, *Adv. Mater. Interfaces*, 2020, **7**, 2000882.
